1 **The most comprehensive annotation of the Krill**  
2 **transcriptome provides new insights for the study of**  
3 **physiological processes and environmental adaptation**

4 Ilenia Urso<sup>1</sup>, Alberto Biscontin<sup>1</sup>, Davide Corso<sup>1</sup>, Cristiano Bertolucci<sup>2,3</sup>, Chiara Romualdi<sup>1</sup>, Cristiano De  
5 Pittà<sup>1</sup>, Bettina Meyer<sup>4,5,6\*</sup>, Gabriele Sales<sup>1\*</sup>

6 <sup>1</sup>University of Padova, Department of Biology Via U. Bassi 58/B, 35131 Padova (PD) – Italy

7 <sup>2</sup>University of Ferrara, Department of Life Sciences and Biotechnology Via Luigi Borsari 46 44121  
8 Ferrara (FE) – Italy

9 <sup>3</sup>Biology and Evolution of Marine Organisms, Stazione Zoologica Anton Dohrn Napoli, Villa Comunale,  
10 80121 Naples, Italy

11 <sup>4</sup>Alfred Wegener Institute Helmholtz Centre for Polar and Marine Research Am Handelshafen 12  
12 D-27570 Bremerhaven – Germany

13 <sup>5</sup>Institute for Chemistry and Biology of the Marine Environment (ICBM) Carl-von-Ossietzky University  
14 Carl-von-Ossietzky-Straße 9-11 D-26111 Oldenburg – Germany

15 <sup>6</sup>Helmholtz Institute for Functional Marine Biodiversity (HIFMB) at the University of Oldenburg,  
16 Oldenburg, 26111, Germany.

17 \* **Co-corresponding authors:** [gabriele.sales@unipd.it](mailto:gabriele.sales@unipd.it), [bettina.meyer@awi.de](mailto:bettina.meyer@awi.de)

18

## 19 Abstract

20 The krill species *Euphausia superba* plays a critical role in the food chain of the  
21 Antarctic ecosystem, as the abundance of its biomass affects trophic levels both below  
22 it and above. Major changes in climate conditions observed in the Antarctic Peninsula  
23 region in the last decades have already altered the distribution of the krill population  
24 and its reproductive dynamics. A deeper understanding of the adaptation capabilities  
25 of this species, and of the molecular mechanisms behind it are urgently needed. The  
26 availability of a large body of RNA-seq assays gave us the opportunity to extend the  
27 current knowledge of the krill transcriptome, considerably reducing errors and  
28 redundancies. Our study covered the entire developmental process, from larval stages  
29 to adult individuals, providing information of central relevance for ecological studies.  
30 Here we describe the KrillDB<sup>2</sup> database, a resource combining the latest annotation  
31 of the krill transcriptome with a series of analyses specifically targeting genes and  
32 molecular processes relevant to krill physiology. KrillDB<sup>2</sup> provides in a single resource  
33 the most complete collection of experimental data and bioinformatic annotations: it  
34 includes an extended catalog of krill genes; an atlas of their expression profiles over  
35 all RNA-seq datasets publicly available; a study of differential expression across  
36 multiple conditions such as developmental stages, geographical regions, seasons,  
37 and sexes. Finally, it provides initial indications about non-coding RNAs, a class of  
38 molecules whose contribute to krill physiology has never been reported before.

39

## 40 Introduction

41 Antarctic krill *Euphausia superba* (hereafter krill) represents a widely distributed  
42 crustacean of the Southern Ocean and one of the world's most abundant species with  
43 a total biomass between 100 and 500 million tonnes [1]. Due to its crucial ecological  
44 role in the Antarctic ecosystem, where it represents a link between apex predators and  
45 primary producers, several studies have been carried out over the years in order to  
46 characterize krill distribution [2, 3, 4], population dynamics and structuring [5, 6] and  
47 above all to understand its complex genetics [5, 7, 8, 9]. A sizable fraction of these  
48 studies focused on the DNA, specifically on mtDNA variation; however, the information  
49 available about krill genetics remains relatively modest. The difficulty in the  
50 progression of this kind of study mainly depends on the extraordinarily large krill  
51 genome size [10], which is more than 15 times larger than the human genome. This  
52 aspect largely complicates DNA sequencing, which is the reason why in recent years  
53 - together with the advances in high-throughput RNA-sequencing techniques -  
54 different krill transcriptome resources have been developed [11-16]. However, it was  
55 with the KrillDB project [17] that a detailed and advanced genetic resource was  
56 produced and made available to the community as an organized database. KrillDB is  
57 a web-based graphical interface with annotation results coming from the *de novo*  
58 reconstruction of krill transcriptome, assembling more than 360 million Illumina  
59 sequence reads.

60 Here we describe an update to KrillDB, now renamed KrillDB<sup>2</sup> (available at the address  
61 <https://krilldb2.bio.unipd.it/>), specifically focusing on two aspects: the improvement of  
62 the quality and breadth of the krill transcriptome sequences previously reconstructed,  
63 thanks to the addition of an unprecedented amount of RNA-sequencing data; and,

64 correspondingly, an increase in the amount of annotation information associated to  
65 each transcript. This improvement is made available through interactive graphs,  
66 images and downloadable files.

67

68

## 69 Material and methods

### 70 Krill collection

71 This study aims at covering the entire developmental process of krill. Therefore, we  
72 used samples coming from different developmental stages to cover the entire *E.*  
73 *superba* transcriptome, from larval to adult specimens. Specifically, adults included  
74 both male and female specimens, as well as summer and winter individuals and they  
75 also came from 3 different geographical regions: Lazarev Sea, South Georgia, and  
76 Bransfield Strait/South Orkney. The entire samples collection used to produce the new  
77 transcriptomic reference and carry out all downstream analysis is listed in **Table S1**  
78 (Supplementary Material).

### 79 Transcriptome assembly strategy

#### 80 Multiple independent *de novo* assemblies

81 The assembly of short (Illumina) reads to reconstruct the transcriptomes of non-model  
82 organisms has been subject to a considerable amount of research. Out of the many  
83 tools developed for this task, we selected the five which are arguably the most popular  
84 in the field: Trinity [18], BinPacker [19], rnaSPAdes [20], TransABySS [21] and IDBA-  
85 tran [22]. We summarized all the steps of the assembly reconstruction strategy,  
86 annotation process and downstream analyses in **Fig 1**.

87

88 **Fig 1. Workflow of the assembly process, annotation, database re-design and**  
 89 **downstream analyses.**

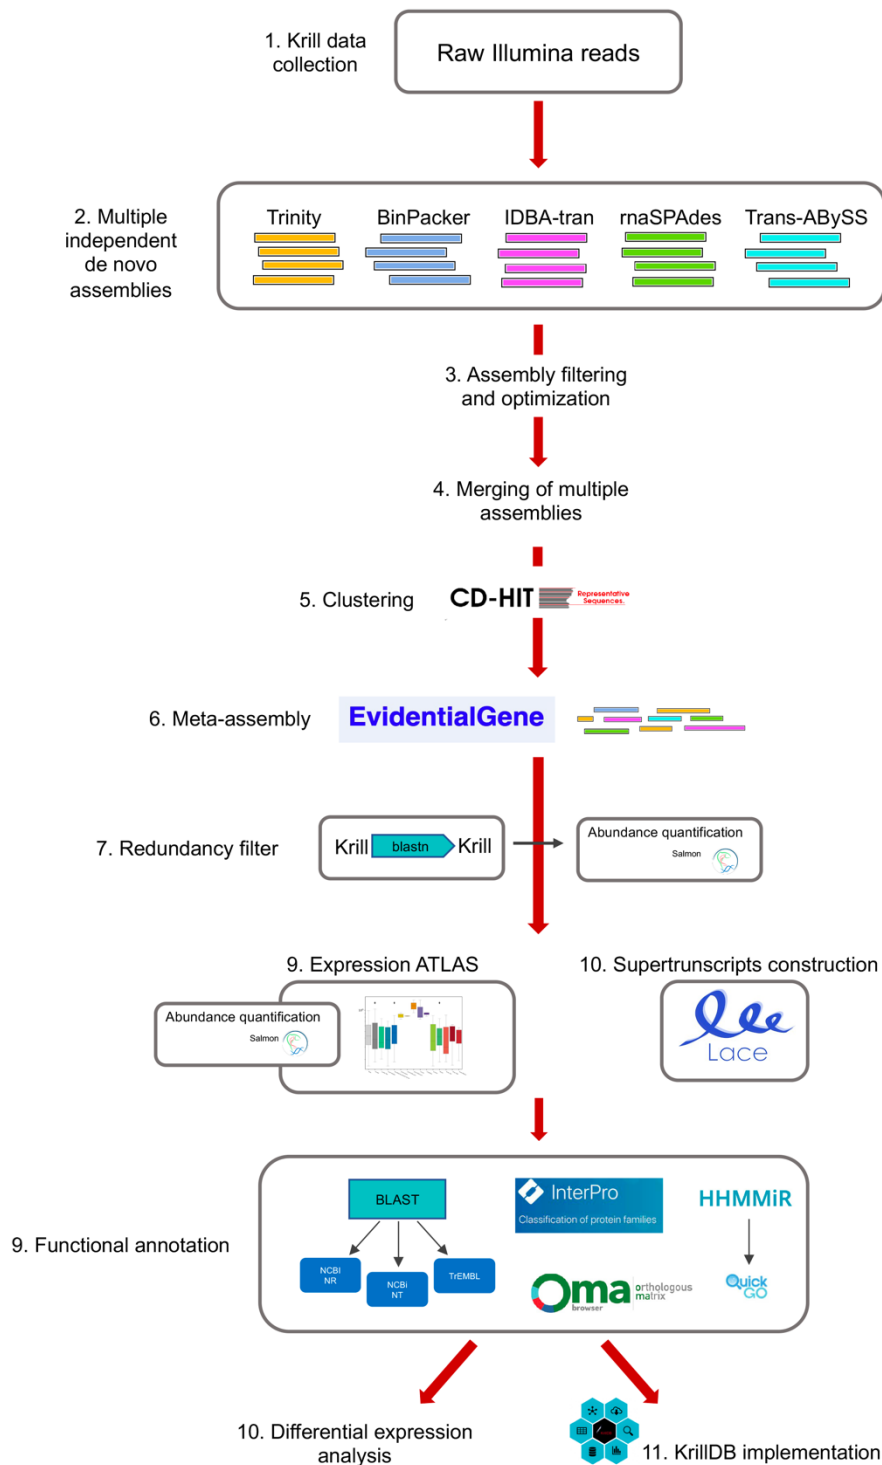

90 At first, we performed a separate transcriptome reconstruction with each of the tools  
 91 listed above. We evaluated their respective advantages through a series of  
 92 independent measures, such as: the total number of transcripts; %GC content; the

93 average fragment length; the total number of bases; the N50 value; and finally, the  
94 results of the BUSCO analysis, which provides a measure of transcriptome  
95 completeness based on evolutionarily informed expectations of gene content from  
96 near-universal single-copy orthologs [23].

## 97 Assembly filtering and optimization

98 The raw sequencing data we used for the assemblies was obtained from different  
99 experiments and included both stranded (**Table S1** – Group 2) and unstranded  
100 libraries (**Table S1** – Group 1). As mixing these two types of libraries in a single  
101 assembly is not well supported, we decided to run each software twice: we thus  
102 generated a total of ten different *de novo* assemblies.

103 We used Trimmomatic [24] to remove adapter sequences and other artifacts from raw  
104 Illumina sequences. The, the quality of trimmed reads was checked with the program  
105 FastQC [25] (version 0.11.9). *De novo* transcriptome assembly was performed using  
106 specific parameters depending on the library type (the actual commands used are  
107 listed in **Table S2**, Supplementary Material).

108 Once assembled, a combination of two filtering steps was then applied to the newly  
109 reconstructed transcriptomes to discard artifacts and improve the assembly quality.

110 First, we estimated the abundances of all the transcripts reconstructed by each  
111 assembler using the Salmon software [26] (v. 1.4.0). Specifically, we used the  
112 following parameters were used: samples coming from unstranded library (**Table S1**  
113 – Group 1) were aligned using the options “-l ISR -1 --validateMappings”; samples  
114 coming from stranded library (**Table S1** – Group 2) were aligned using the options “-l  
115 IU --validateMappings”. Samples were grouped according to the main experimental  
116 conditions: (1) sex, with female and male levels; (2) geographical area, covering

117 Bransfield Strait, South Georgia, South Orkney and Lazarev Sea; and (3) season, with  
118 summer and winter levels. Abundance estimates were imported in the R statistical  
119 environment using the *tximport* package [27] and we implemented a filter to keep only  
120 those transcripts showing an expression level of at least 1 transcript per million (TPM)  
121 within each of the three experimental conditions.

122 In a second step, we considered the results of all assemblers jointly, and we ran the  
123 “cd-hit-est” program [28] in order to cluster similar sequences and to produce a set of  
124 non-redundant representative transcripts. Specifically, we collapsed all sequences  
125 sharing 95% or more of their content, thus reducing the number of transcripts from  
126 1,650,404 to 551,110.

## 127 Meta-assembly

128 The procedure described above was designed to identify near-duplicate sequences  
129 deriving from different software, but likely corresponding to the same biological  
130 transcript. As a further refinement, we were also interested in grouping resulting  
131 transcripts into units corresponding to genes. To this end, we relied on the  
132 EvidentialGene pipeline [29, 30]. We applied the “tr2aacds” tool which clusters  
133 transcripts and classifies them to identify the most likely coding sequence representing  
134 each gene. The software subdivides sequences into different categories, including  
135 primary transcript with alternates (main), primary without alternates (noclass),  
136 alternates with high and medium alignment to primary (althi1, althi, altmid) and partial  
137 (part) incomplete transcripts. A “coding potential” flag is also added, separating coding  
138 from non-coding sequences (see section “KrillDB<sup>2</sup> Web Interface”). The meta-  
139 assembly thus obtained consisted in 274,840 putative transcripts, subdivided into  
140 173,549 genes.



141 As these figures remained unrealistically high, we performed another round of  
142 analyses to identify redundant or mis-assembled sequences still appearing in our  
143 transcriptome. Here we used a combination of BLAST searches against known protein  
144 and nucleotide databases (NR, NT, TREMBL) and information deriving from full-  
145 length, experimentally validated transcripts from a previous study [31]. Results  
146 confirmed that the newly reconstructed transcriptome fully represented krill RNAs, but  
147 the large amount of input reads, together with the number of independent *de novo*  
148 assemblers, likely led to an inflation in the number of alternative splicing variants being  
149 reconstructed. Moreover, transcript alignments against BUSCO genes [23] and the  
150 *doubletime*, *cry1*, *shaggy* and *vriille* full-length transcripts from [31] highlighted the fact  
151 that multiple fragments of the same gene were incorrectly assembled as separate  
152 transfrags. To remove these artifacts, first we aligned all transcript sequences in our  
153 meta-assembly against each other using the *blastn* tool. We discarded all sequences  
154 already included in a longer transcript for more than the 90% of their length. This filter  
155 helped us remove 78,731 redundant sequences (29% of transcripts, overall). Then,  
156 we ran a new abundance quantification using Salmon and we discarded all transcripts  
157 with an average abundance below 0.1 TPM.

158 The combination of all the filters discussed above allowed us to reduce the number of  
159 transcripts to 151,585 and, correspondingly, that of genes to 85,905. Our approach  
160 discarded redundant genes, while retaining alternative transcripts with a sufficient level  
161 of uniqueness in their sequence. This was confirmed by the fact that although we  
162 removed almost 45% of the initially assembled transcripts, this filtering barely affected  
163 the average read mapping rate, which went from 89% (initial EvidentialGene output)  
164 to 88% (full filtering).

165 In order to enhance the interpretability of the transcriptome reconstruction, we also  
166 employed a SuperTranscripts analysis, on the basis of the workflow proposed by [32].  
167 Specifically, we ran the Lace software (<https://github.com/Oshlack/Lace>) to  
168 reconstruct the block structure of each gene (see section “KrillDB<sup>2</sup> Web Interface”).

169

## 170 Functional Annotation

171 Assembled fragments were aligned against the NCBI NR (non-redundant)  
172 UniProtKB/TrEMBL protein databases and against the NCBI NT nucleotide collection  
173 (data downloaded on 22/04/2021). We also ran InterproScan (version 5.51-85.0) in  
174 order to search for known functional domains and to predict protein family  
175 membership. Results with an *e-value* greater than 1e-6 for proteins (*blastx*) or 1e-9  
176 for nucleotides (*blastn*) were discarded.

177 Orthology inference was performed using the Orthologus MAtrix (OMA) standalone  
178 package [33] (<https://omabrowser.org/standalone/>) which relies on a complete catalog  
179 of orthologous genes among more than 2,300 genomes covering the entire tree of life.  
180 This analysis helped us identify, based on protein sequences, those krill transcripts  
181 showing an orthology relationship with genes from other species and which sets of  
182 genes derived from a single common ancestral gene at a given taxonomic range [34].  
183 Finally, all krill transcripts were compared against the RNAcentral database  
184 (<https://rnacentral.org/>; <https://doi.org/10.1093/nar/gkw1008>) in order to identify any  
185 homology with the mature sequences of known microRNAs from other species.

## 186 Expression Atlas

187 We used the final assembly described above to re-estimate transcript abundances  
188 over a wide range of RNAseq dataset (see **Table S1**) including:

- 189 ● Larval krill at two different stages of development exposed to different CO<sub>2</sub>  
190 conditions, coming from [17] (**Table S1** – Group 1)
- 191 ● Adult krill (48 samples) coming from different geographical areas (Bransfield  
192 Strait, Lazarev Sea, South Georgia, South Orkney) and different seasons

193 (summer and winter), divided into male and female specimens [35] (Table S1  
194 – Group 2)

195 ● Adult krill exposed to three different temperatures – Low Temperature, Mid  
196 temperature, High Temperature (Table S1 – Group 3)

197 ● Adult krill divided into male and female specimens [36] (Table S1 – Group 4)

198 Overall, these datasets include six experimental factors: geographical area, season,  
199 developmental stage, pCO<sub>2</sub> exposure condition, sex and temperature. Newly  
200 computed transcript abundances and raw counts were imported using R (version  
201 4.0.5) and the package *tximport* (version 1.18.0). Batch effect removal was performed  
202 using the *removeBatchEffect* function implemented in the *limma* package (version  
203 3.46.0). The resulting count matrix of transcripts (rows) across samples (columns) was  
204 then converted to the transcripts per million (TPM) scale. Finally, results were  
205 summarized to the gene level using the *isoformToGeneExp* function  
206 (IsoformSwitchAnalyzeR version 1.12.0). The expression levels for each experimental  
207 condition are displayed in KrillDB<sup>2</sup> as a barplot, as part of the webpage for each gene  
208 or transcript (see section “KrillDB<sup>2</sup> Web Interface”).

## 209 Differential Expression Analysis

210 Transcript-level abundances and estimated counts were summarized at the gene-level  
211 using the package *tximport*. Resulting counts were normalized to remove unwanted  
212 variation by means of the RUVg method [37]. Specifically, we performed a preliminary  
213 between-sample normalization (EDASeq, version 2.24.0) to adjust for sequencing  
214 depth. Following the workflow outlined in the RUVseq vignette, we identified a set of  
215 negative control genes with an FDR level larger than 0.8. We applied the RUVg  
216 method to estimate k=2 factors of unwanted variation and we included those in the

217 design matrix for the final differential expression analysis, performed using the GLM  
218 method implemented by the edgeR software (version 3.32.1). All p-values were  
219 corrected using the Benjamini-Hochberg method.

## 220 MicroRNAs

221 We also investigated the possibility that the new transcriptome included sequences  
222 corresponding to the precursors of krill microRNAs.

223 To this aim, we ran the HHMMiR software [38], which combines structural and  
224 sequence information to train a Hierarchical Hidden Markov Model for the identification  
225 of microRNA genes. We also performed a *blastn* search of all our assembled  
226 transcripts against the collection of miRBase (<http://www.mirbase.org/>) mature  
227 sequences. Results from these two analyses were combined: we collected all  
228 transcripts with a HHMMiR score below or equal to 0.71 and an alignment to a known  
229 mature microRNA with at most two mismatches. We then used the QuickGO tool  
230 (<https://www.ebi.ac.uk/QuickGO/>) to identify any potential association among our  
231 putatively identified microRNA precursors and GO categories.

## 232 Opsin phylogeny

233 To identify novel opsin genes in krill, we manually examined manually the list of  
234 transcripts that were annotated as “opsin” by our automated pipeline. Furthermore, the  
235 entire krill transcriptome was aligned against a curated opsin dataset (including 996  
236 visual and non-visual opsins [39]) using Blast+ (version 2.11.0). For genes with  
237 multiple alternative variants, we selected the longest transcript as a representative  
238 sequence. Secondary structure was assessed by the NCBI Conserved Domain  
239 Search (CDD database, May 2021). A phylogenetic tree was generated using the

240 MUSCLE alignment tool and the Maximum Likelihood method (Dayhof substitution  
241 matrix and Nearest-Neighbor-Interchange method) as implemented in MEGA X  
242 (version 10.2.6, <https://www.megasoftware.net/>). New opsins were aligned against a  
243 curated invertebrate-only opsin data set [40], the previously cloned krill opsins [41],  
244 and the full-length onychopsin and arthropsin sequences available on the NCBI  
245 Protein database (May 2021, [ncbi.nlm.nih.gov/protein](http://ncbi.nlm.nih.gov/protein)). The tree was rooted using the  
246 human G protein-coupled receptor VIPR1 as an outgroup.

## 247 Web Interface Implementation

248 The website was developed as a Python application based on the Flask framework.  
249 Data is stored in a PostgreSQL 12.8 database (<http://www.postgresql.com>). The  
250 sequences of the assembled transcripts and corresponding proteins are available for  
251 download as FASTA files. Gene and transcript pages have been updated with barplots  
252 implemented using the Seaborn Python library (version 0.11.1).

253

## 254 Results

### 255 Transcriptome Quality

256 We checked the quality of our transcriptome reconstruction quality step by step,  
257 starting from the 10 independent *de novo* assemblies, then evaluating the potential of  
258 merging all assemblies into a unique meta-assembly through EvidentialGene, and  
259 finally filtering the transcriptome for redundancy. All these results are summarized in  
260 **Fig 2**. As previously mentioned, the result of our reconstruction strategy was evaluated  
261 using different measures: the N50 statistics highlighted an increase in transfrags  
262 lengths at each step. Recent benchmarks, such as [\[42\]](#), have shown that, while  
263 reconstructing the transcriptome of a species, no single approach is uniformly superior  
264 at reconstructing the transcriptome of a species: the quality of each result is influenced  
265 by a number of factors, both technical (*k*-mer size, strategy for duplicate resolution)  
266 and biological (genome size, presence of contaminants). In our study we observed  
267 that, although a consistent number of sequences was removed through each step of  
268 the assembly, merging and filtering procedure, we didn't encounter any decline in the  
269 quality described by the basic statistics of the reconstructed transcripts.

270 **Fig 2. Transcriptome quality assessment results.** Panel (a) shows the results of  
271 the first assembly filtering in terms of total number of transcripts. Quality measures  
272 computed at each assembly step are reported in panel (b), from the five *de novo*  
273 assembly algorithms (top), after the first filtering process (bottom) and finally  
274 comparing the quality of the EvidentialGene meta-assembly and the final krill  
275 transcriptome after the redundancy filter (right). BUSCO assessment results (c) on  
276 EvidentialGene transcriptome (left) and krill transcriptome after last filter (right): the  
277 EvidentialGene transcriptome was characterized by 95.3% Complete sequences  
278 (50.2% single-copy, 45.1% duplicated), 0.6% Fragmented and 4.1% Missing  
279 sequences. The same analysis on the final krill transcriptome reconstruction produced  
280 93.2% Complete transcripts (49.8% Single-copy, 43.4% Duplicated), 0.6%  
281 Fragmented and 6.2% Missing sequences.

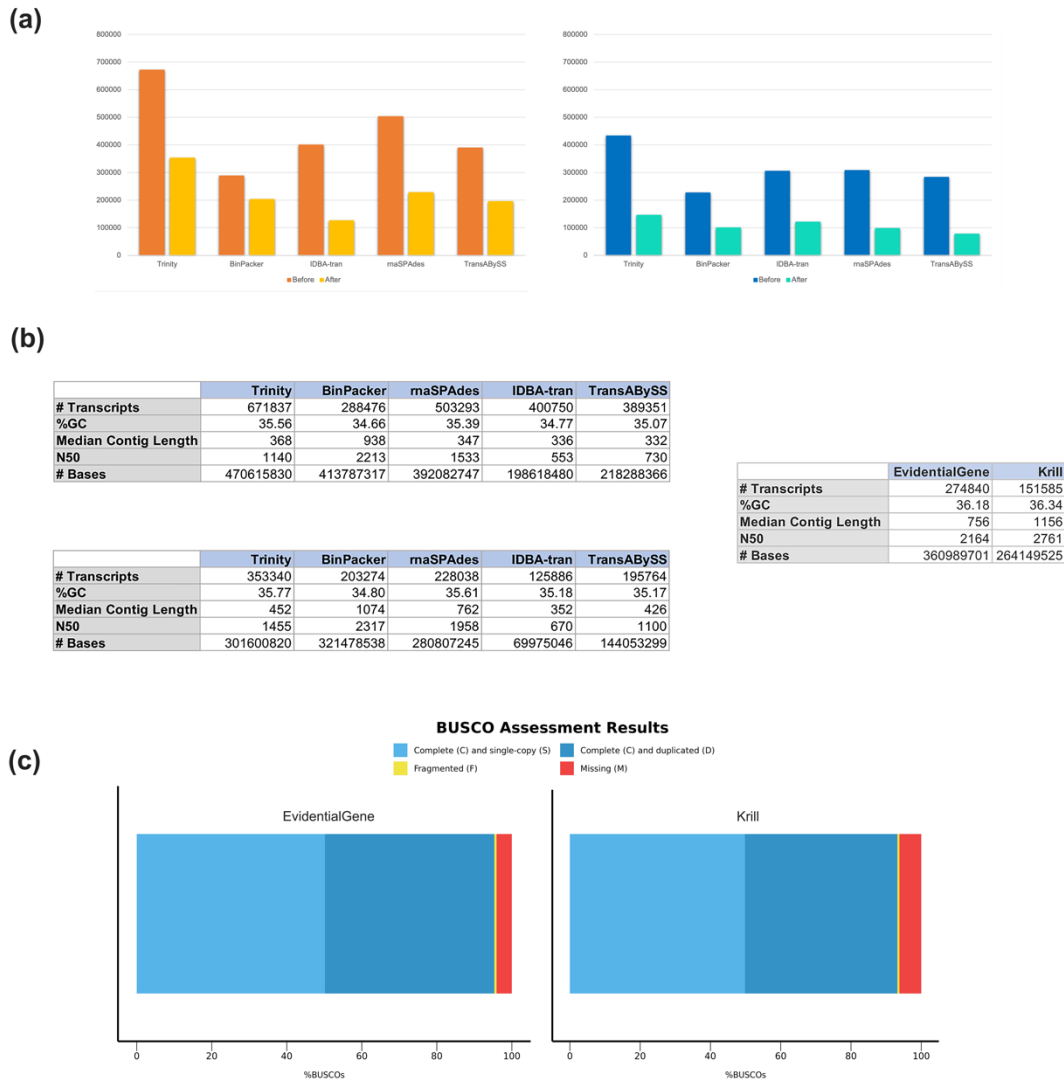

282 We then explored the completeness of the krill transcriptome according to conserved  
 283 ortholog content using BUSCO searching our sequences among all expected  
 284 orthologs from Arthropoda phylum. This analysis confirms that our strategy for  
 285 reducing redundancy did not affect transcriptome completeness: indeed, the fraction  
 286 of complete single-copy essential genes drops by 2.1% while our strategy discards  
 287 more than 44% redundant transfrags.

288 We finally compared our quality assessment results with those from previously  
 289 released krill transcriptomes (**Table 1**). Our latest assembly significantly improves all



290 the metrics we have discussed above and highlights the potential of the filtering  
291 strategy we have devised.

292 **Table 1.** Quality statistics of the previously released krill transcriptomes compared to  
293 the newly assembled KrillDB<sup>2</sup>. GenBank accession GFCS00000000.1 refers to the  
294 SuperbaSe krill transcriptome reference [43].

|                             | GFCS00000000.1 | KrillDB     | KrillDB <sup>2</sup> |
|-----------------------------|----------------|-------------|----------------------|
| <b>#Total Transcript</b>    | 484080         | 133965      | 151585               |
| <b>Median Contig Length</b> | 439            | 683         | 1156                 |
| <b>N50</b>                  | 1071           | 1294        | 2761                 |
| <b>BUSCO - Complete</b>     | 827 (81.6%)    | 536 (52.9%) | 944 (93.2%)          |

## 295 Functional Classification

296 Results from the functional annotation analyses showed that 63,633 contigs matched  
297 at least one protein from the NCBI NR (non-redundant) collection, corresponding to  
298 about 42% of the total krill transcriptome, while 62,249 transfrags found a match  
299 among UniProtKB/TREMBL protein sequences (41% of the total). Furthermore,  
300 22,071 krill transcripts (15% of the total) had significant matches with sequences in  
301 the NCBI NT nucleotide database. To classify transcripts by putative function, we  
302 performed a GO assignment. Specifically, 2,612 GO terms (corresponding to 13068  
303 genes) were assigned: 1,128 of those (corresponding to 1178 genes) represented  
304 molecular functions; 1,099 terms (corresponding to 6991 genes) were linked to  
305 biological processes; 385 terms (corresponding to 4303 genes) represented cellular  
306 components.

## 307 A case study on the discovery of opsin genes

308 To evaluate the gene discovery potential of the new assembly, we searched the  
309 transcriptome for novel members of the opsin family. Opsins are a group of light  
310 sensitive G protein-coupled receptors with seven transmembrane domains. 14 genes  
311 were annotated as putative opsins and the conserved domains analysis revealed that  
312 all of them possess the distinctive 7  $\alpha$ -helix transmembrane domain structure. The 8  
313 previously cloned opsins [41] were all represented in KrillDB<sup>2</sup> (sequence identity  
314 >90%; **Table S3**, Supplementary Material). The other 6 genes we identified can  
315 therefore be considered new putative opsins. Among those, we found 4 putative  
316 rhabdomeric opsins: *EsRh7* and *EsRh8*, with 70% and 59 % of amino acid identity to  
317 *EsRh1a* and *EsRh4*, respectively; *EsRh9* and *EsRh10* showing high sequence identity  
318 (87% and 74%, respectively) to *EsRh5*. Further, we identified 2 putative ancestral

319 opsins: a non-visual arthropsin (*EsArthropsin*), and an onychopsin (*EsOnychopsin*)  
320 with 70% and 49% of sequence identity with crustacean and onychophoran  
321 orthologous, respectively. Phylogenetic analysis (**Fig 3**) suggested that *EsRh7-10* are  
322 middle-wavelength-sensitive (MWS) rhabdomeric opsins, and further confirmed  
323 *EsArthropsin* and *EsOnychopsin* annotation.

324 **Fig 3. Phylogenetic relationships of *Euphausia superba* opsins shown as**  
325 **circular cladogram.** Colored dots indicate krill opsins: red, previously cloned opsins;  
326 green, novel identified opsins. The spectral sensitivities of rhabdomeric opsin clades  
327 were inferred from the curated invertebrate-only opsin dataset proposed by DeLeo &  
328 Bracken-Grissom, 2020. Represented opsin classes: LWS, long-wavelength-  
329 sensitive; LSM, long/middle-wavelength-sensitive; MWS, middle-wavelength-  
330 sensitive; SWS/UV, short/UV-wavelength-sensitive; ONY, onychopsins; MEL,  
331 melanopsins; PER, peropsin; ART, arthropsin. Rectangular phylogram is reported in  
332 **Fig S1** (Supplementary Material).

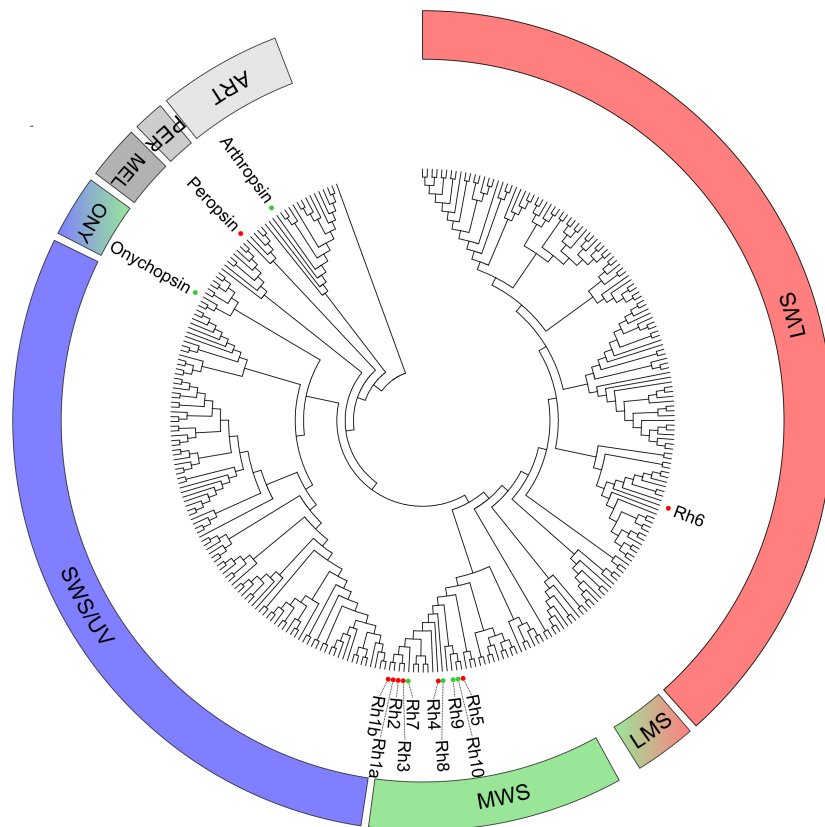

333

334

## 335 Differential Expression

336 The availability of a new assembly of the krill transcriptome, reconstructed collecting  
337 the largest amount of experimental data available thus far, suggested the possibility  
338 of performing a more detailed investigation of differential expression patterns. We  
339 decided to reanalyze the dataset from [35] to assess the possibility of identifying  
340 differentially expressed genes which were not detected in the original study due to the  
341 use of an older reference transcriptome [15].

342 Our design matrix for the model included all the independent factors (*season*, *area*  
343 and *sex*) and, in addition, the interaction between *area* and *season*, *sex* and *area*, *sex*  
344 and *season*.

345 In total 1,741 genes were found to be differentially expressed (DEG) among  
346 experimental conditions. They correspond to around 2% of the total reconstructed  
347 genes. In the previous work by [35] the same samples were quantified against a total  
348 of 58,581 contigs [15] producing a total of 1,654 DEGs. **Table 2** summarizes the list  
349 of contrasts that were performed, each one with the number of differentially expressed  
350 up and down regulated genes.

351 **Table 2. List of contrast computed with total number of differentially expressed**  
352 **genes and numbers of up- and downregulated genes.**

| Reference condition  | Alternative condition                 | Sample group | # Total | # Upregulated | # Downregulated |
|----------------------|---------------------------------------|--------------|---------|---------------|-----------------|
| Summer               | Winter                                | Group 2      | 1195    | 1078          | 117             |
| Male                 | Femae                                 | Group 2      | 14      | 7             | 7               |
| Male/Summer          | Female/Winter                         | Group 2      | 12      | 6             | 6               |
| South Georgia        | Lazarev Sea                           | Group 2      | 79      | 26            | 53              |
| South Georgia        | Bransfield Strait-South Orkney        | Group 2      | 28      | 6             | 22              |
| Lazarev Sea          | Bransfield Strait-South Orkney        | Group 2      | 17      | 13            | 4               |
| South Georgia/Male   | Bransfield Strait-South Orkney/Female | Group 2      | 10      | 6             | 4               |
| South Georgia/Male   | Lazarev Sea/Male                      | Group 2      | 19      | 8             | 11              |
| South Georgia/Summer | Bransfield Strait-South Orkney/Winter | Group 2      | 75      | 66            | 9               |
| Lazarev Sea/Summer   | Bransfield Strait-South Orkney/Winter | Group 2      | 359     | 173           | 186             |
| South Georgia/Summer | Lazarev Sea/Summer                    | Group 2      | 188     | 150           | 38              |
| Lazarev Sea/Male     | Bransfield Strait-South Orkney/Female | Group 2      | 20      | 10            | 10              |

353 1,195 DEGs were identified in the comparison between summer and winter  
 354 specimens: 1,078 were up-regulated and 117 down-regulated. 396 of such DEGs had  
 355 some form of functional annotation. In general, these results are in accordance with  
 356 the discussion by Höring [35], which found that seasonal differences are predominant  
 357 in comparison to regional ones. A summary of the DEGs is listed in **Table 3**. Complete  
 358 tables of differentially expressed genes are downloadable on KrillDB<sup>2</sup> (**Fig 4c**;  
 359 <https://krilldb2.bio.unipd.it/>, Section “Differentially Expressed Genes (DEGs)”).

360 **Table 3. List of biologically relevant DEGs identified, starting from those already**  
 361 **described by Höring et al [35].** Genes that were already found to be differentially  
 362 expressed in the work by Höring are reported in black, while newly DEGs identified by  
 363 our analysis are reported in red.

| Process                                            | Gene                                                             | KrillDB <sup>2</sup> Gene |
|----------------------------------------------------|------------------------------------------------------------------|---------------------------|
| Development of cuticle (moult cycle)               | Peritrophin                                                      | ESG063925                 |
|                                                    | Chitooligosaccharidolytic beta-N- acetylglucosaminidase          | ESG040750                 |
|                                                    | Carbohydrate sulfotransferase 11                                 | ESG043538                 |
|                                                    | Trypsin like                                                     | ESG046724                 |
|                                                    | Chitinase 1                                                      | ESG041912                 |
|                                                    | Chitinase 3                                                      | ESG043598                 |
|                                                    | Chitinase 4                                                      | ESG040248                 |
|                                                    | Endochitinase-like                                               | ESG041048                 |
|                                                    | Glycosyltransferase 8 domain-containing protein 1-like           | ESG047683                 |
|                                                    | Collagen alpha-1                                                 | ESG039607                 |
|                                                    | Glutamine-fructose-6-phosphate aminotransferase                  | ESG040051                 |
|                                                    | Pupal cuticle protein 20-like                                    | ESG045660                 |
|                                                    | Early cuticle protein 3                                          | ESG054542                 |
| Endocuticle                                        | ESG037580                                                        |                           |
| Crustin 1                                          | ESG059398                                                        |                           |
| Immune response                                    | Laccase                                                          | ESG048485                 |
|                                                    | Leucine rich repeat only protein 2                               | ESG048485                 |
| Embryogenesis                                      | Blastula protease 10                                             | ESG045350                 |
| Development and reproduction                       | Aldehyde dehydrogenase family 8                                  | ESG043319                 |
|                                                    | Retinoid-inducible serine carboxypeptidase                       | ESG040940                 |
|                                                    | Dehydrogenase/reductase SDR family member 11                     | ESG048936                 |
| Reproduction                                       | Vitellogenin                                                     | ESG035720                 |
|                                                    | Hematopoietic prostaglandin D synthase                           | ESG056241                 |
|                                                    | Carboxylic ester hydrolase                                       | ESG040590                 |
|                                                    | Adiponectin receptor protein                                     | ESG049090                 |
|                                                    | Type I iodothyronine deiodinase                                  | ESG061750                 |
|                                                    | Ovochymase 1                                                     | ESG044749                 |
|                                                    | Ovochymase 2                                                     | ESG052923                 |
|                                                    | Serine/threonine-protein phosphatase PP1-gamma catalytic subunit | ESG045461                 |
| Doublesex and mab-3 related transcription factor 1 | ESG045173                                                        |                           |
| Metalloendopeptidase activity                      | Nepriylsin 1                                                     | ESG037511                 |
| Steroid metabolism                                 | Inactive hydroxysteroid dehydrogenase-like protein 1             | ESG050201                 |
|                                                    | Short-chain dehydrogenase/ reductase family 42E member 1         | ESG041089                 |
| Lipid metabolism                                   | Epoxide hydrolase                                                | ESG048309                 |
|                                                    | Enoyl-CoA isomerase                                              | ESG051749                 |
|                                                    | Long-chain-fatty-acid-CoA ligase                                 | ESG040433                 |
| Glucose metabolic process                          | Furin-1 precursor                                                | ESG037914                 |
| Cell cycle                                         | Histone-lysine M-methyltransferase MLL5                          | ESG035391                 |
| Circadian clock                                    | Euphausia superba cry gene for cryptochrome, exons 1-7           | ESG035391                 |
|                                                    | Vrille                                                           | ESG040113                 |
| Photoreception                                     | Opsin 5                                                          | ESG047639                 |

## 364 Summer vs Winter

365 We selected a series of genes among seasonal DEGs according to what has been  
366 already described in the literature. Höring et al. [35] previously identified and described  
367 35 relevant DEGs involved in seasonal physiology and behavior: we recovered the  
368 same gene signature in our own analysis by comparing summer to winter samples.  
369 The majority of these DEGs appear to be involved in the development of cuticles  
370 (*chitin synthase*, *carbohydrate sulfotransferase 11*), lipid metabolism (*fatty acid*  
371 *synthase 2*, *enoyl-CoA ligase*), reproduction (*vitellogenin*, *hematopoietic prostaglandin*  
372 *D synthase*), metabolism of different hormones (*type 1 iodothyronine deiodinase*) and  
373 in the circadian clock (*cryptochrome*). Our results also include DEGs that were found  
374 to be involved in the moult cycle of krill in other studies [16]. Specifically, we identified  
375 a larger group of genes involved in the different stages of cuticle developmental  
376 process (*peritrophin-A domain*, *calcified cuticle protein*, *glycosyltransferase 8-domain*  
377 *containing protein 1*, *collagen alpha 1*, *glutamine-fructose 6 phosphate*), including  
378 proteins such as *cuticle protein-3,6,19.8*, *early cuticle protein*, *pupal cuticle protein*,  
379 *endocuticle structural glycoprotein*, *chitinase-3* and *chitinase-4*, the latter representing  
380 a group of chitinase which have been shown to be expressed predominantly in gut  
381 tissue during larval and/or adult stages in other arthropods and are proposed to be  
382 involved in digestion of chitin-containing substrates [44]. Finally, in addition to *trypsin*  
383 and *crustin 4* (immune-related gene, essential in early pre-moult stage when krill still  
384 have a soft cuticle to protect them from pathogen attack, as seen by Seear et al. [16])  
385 we also identified *crustin-1,2,3,5* and 7. All the reported genes were up-regulated in  
386 summer, the period in which growth take place and krill moult regularly.  
387 Cuticle development genes were also identified as differentially expressed in the  
388 analysis of the interaction of multiple factors, in particular between male samples

389 coming from South Georgia and female specimens coming from the area of Bransfield  
390 Strait-South Orkney (considered as a unique area since they are placed at similar  
391 latitudes). Strikingly, we also identified a pro-resilin gene, whose role in many insects  
392 consists in providing efficient energy storage, being upregulated in South Georgia  
393 male specimens.

#### 394 Interaction Effects

395 A number of relevant DEGs were found among specific interactions of regional and  
396 seasonal factors. In the comparison between krill samples in South Georgia in summer  
397 and individuals sampled in Bransfield Strait-South Orkney in winter we found genes,  
398 up-regulated in summer in South Georgia, that are related to reproductive activities,  
399 such as *doublesex* and *mab-3 related transcription factor*. The latter is a transcription  
400 factor crucial for sex determination and sexual differentiation which was already  
401 described in other arthropods [45]. Since no differentially expressed gene related to  
402 reproduction was found by HÖring et al. [35] in the same comparisons, this suggests  
403 that the new krill transcriptome improves the interpretability of expression studies and  
404 the characterizations of krill samples.

405 Finally, the comparison between male individuals from the Lazarev Sea and female  
406 specimens from the Bransfield Strait-South Orkney showed additional DEGs involved  
407 in reproduction, such as *ovochymase 2*, usually highly expressed in female adults or  
408 eggs, *serine protease* and a *trypsin-like gene*. In particular, *trypsin-like genes* are  
409 usually thought to be digestive serine proteases, but previous works suggested that  
410 they can play other roles [46]; many trypsins show female or male-specific expression  
411 patterns and have been found exclusively expressed in males, as in our analysis,  
412 suggesting that they play a role in the reproductive processes.

413 The simultaneous presence of differentially expressed genes involved in different  
414 steps of the krill moulting cycle, in the reproductive process and in sexual maturation  
415 that appear to be differentially expressed in same comparisons is in accordance with  
416 what was already observed in krill [47] and other krill species [48]. In particular, there  
417 is evidence of a strong relation between the krill moulting process and its growth and  
418 sexual maturation during the year, which supports and confirms the reliability of our  
419 results in terms of genes involved in such krill life cycle steps.

## 420 Identification of microRNA Precursors

421 In total we identified 261 krill transcripts with sequence homology to 644 known  
422 microRNAs from other species. 306 sequences were linked to at least one GO term,  
423 matching 54 krill transcripts (**Table S4**, Supplementary Material). Among them, we  
424 identified 5 putative microRNAs involved with changes in cellular metabolism (age-  
425 dependent general metabolic decline - GO:0001321, GO:0001323), as well as  
426 changes in the state or activity of cells (age-dependent response to oxidative stress -  
427 GO:0001306, GO:0001322, GO:0001324), 35 microRNAs involved in interleukin  
428 activity and production. We found 26 putative microRNAs likely involved in  
429 *ecdysteroidogenesis* (specifically GO:0042768), a process resulting in the production  
430 of ecdysteroids, moulting and sex hormones found in many arthropods. In addition,  
431 we found a microRNA involved in fused antrum stage (GO:0048165) which appears  
432 to be related in other species to oogenesis. We also identified 27 microRNAs related  
433 to *rhombomere* morphogenesis, formation and development (GO:0021661,  
434 GO:0021663, GO:0021570). These functions have been linked to the development of  
435 portions of the central nervous system in vertebrates, which share the same structure  
436 of those found in arthropod brains. Lastly, 26 krill sequences showed high similarity  
437 with 2 mature microRNA related to the formation of tectum (GO:0043676), which



438 represents in arthropods and, specifically, crustaceans, the part of the brain acting as  
439 visual center.

## 440 KrillDB<sup>2</sup> Web Interface

441 The KrillDB website has been re-designed to include the new version of the  
442 transcriptome assembly. **Figs 4, 5** and **6** collect images taken from the new main  
443 sections of the database. The integrated full-text search engine allows the user to  
444 search for a transcript ID, gene ID, GO term, a microRNA ID or any other free-form  
445 query. Results of full-text searches are now organized into several separate tables,  
446 each representing a different data source or biological aspect (**Fig 4b**). Results of GO  
447 term searches are summarized in a table reporting the related genes with  
448 corresponding domain (**Fig 5a**) or microRNA (**Fig 5b**) match and associated  
449 description. Both gene and transcript-centric pages have been extended with two new  
450 sections: "Orthology" and "Expression" (**Fig 6a**). The Orthology section summarizes  
451 the list of orthologous sequences coming from the OMA analysis, each one with the  
452 species it belongs to and the identity score.

453 The "Expression" section shows a barplot representing abundances estimates  
454 obtained from Salmon. An additional section, called "Gene Structure" (**Fig 6a**), was  
455 added to the gene page on the basis of the results coming from the SuperTranscript  
456 analysis. Specifically, we modified the STViewer.py Python script (from Lace),  
457 optimizing and adapting it to our own data and database structure, in order to produce  
458 a visualization of each gene with its transcripts. Since Lace relies on the construction  
459 of a single directed splice graph and it is not able to compute it for complex clusters  
460 with more than 30 splicing variants, this section is available for a selection of genes  
461 only.

462 The new KrillDB<sup>2</sup> release includes completely updated transcript and gene identifiers.  
463 However, the user searching for a retired ID is automatically redirected to the page  
464 describing the newest definition of the appropriate transcript or gene.

465 The KrillDB<sup>2</sup> homepage now includes two additional sections (**Fig 4a**): one is  
466 represented by the possibility to perform a BLAST search. Any nucleotide or protein  
467 sequence (*query*) can be aligned against krill sequences stored in the database.  
468 Results are summarized in a table containing information about the krill transcripts  
469 (*target*) that matched with the user's query, and the e-value corresponding to the  
470 alignment. The other new section, called "Differentially Expressed Genes", allows the  
471 user to browse all the tables listing the genes that were found to be differentially  
472 expressed among the conditions we have described above. A drop-down menu gives  
473 access to the different comparisons; DEG tables (**Fig 4c**) list for each gene its log fold-  
474 change, p- and FDR values as estimated by edgeR. Moreover, each gene is linked to  
475 a functional description (if available) inferred from sequence homology searches.

476 Information about krill transcripts that showed homology with an annotated microRNA  
477 is available in the section "Predicted Hairpin" (**Fig 6b**). It contains a summary table  
478 with details about the hairpin length and the similarity score (as estimated by  
479 HHMMiR), followed by full listing of all the corresponding mature microRNAs (including  
480 links to their miRBase page). In addition, an image displaying the predicted secondary  
481 structure of the hairpin is included (computed by the "fornac" visualization software  
482 from the ViennaRNA suite).

483



490 **Fig 6. Additional sections in gene and transcript pages.** The new sections in the  
 491 gene-centric page show a table listing the orthologous sequences with their belonging  
 492 species and the identity score, a visualization of the gene structure as estimated by  
 493 Lace software and a boxplot coming from Expression Atlas analyses **(a)**. Both  
 494 Orthology and Expression section are integrated also in the transcript-centric page.  
 495 When a transcript is annotated as a putative microRNA, a “Predicted Hairpin” section  
 496 displays a visualization of the hairpin predicted secondary structure and tables  
 497 showing the alignment length, the HHMMiR score and the list of mature microRNAs  
 498 matching **(b)**.

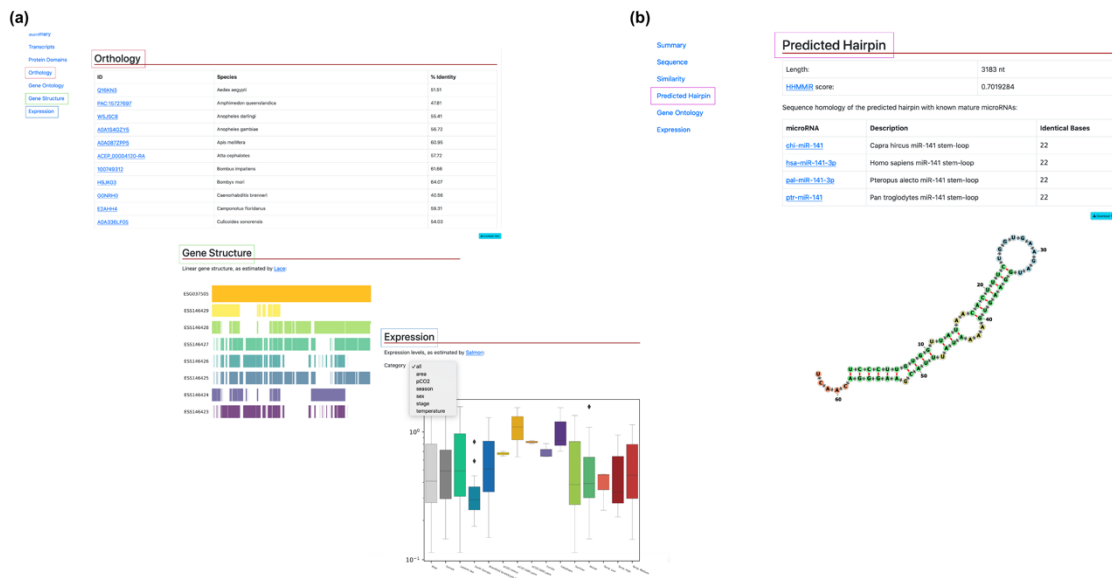

## 499 Discussion

500 The availability of a large amount of public RNA-seq data capturing krill transcripts has  
 501 given us the possibility to re-assemble its transcriptome and to significantly extend its  
 502 annotation. We have now covered the entire developmental process of this species  
 503 and included in our analysis individuals belonging to different seasons and affected by  
 504 different environmental conditions. KrillDB<sup>2</sup> provides the most complete source of  
 505 information about the krill transcriptome and will offer a reliable starting point  
 506 development of novel ecological studies. As shown in **Table 1**, the analysis of the  
 507 quality of previously released krill transcriptome in comparison to the newly assembled  
 508 KrillDB<sup>2</sup> confirmed how the strategy applied did not produce any loss in terms of

509 quality, although a consistent number of transcripts was removed. The quality metrics,  
510 in contrast, were improved both in terms of N50 statistics and transcriptome  
511 completeness: the fraction of complete single-copy essential genes reached the  
512 93.2%.

513 The differential expression analysis we have performed highlights the importance of  
514 specific processes in the complex krill life cycle and in its adaptation capability to the  
515 harsh Antarctic environment.

516 The identification of 6 novel putative opsin sequences almost double the eight that  
517 were previously cloned, demonstrating a significant improvement in the gene  
518 discovery potential of this new version of krill transcriptome. The finding of four novel  
519 MWS rhabdomeric opsins, an onychopsin, and a non-visual arthropsin further enrich  
520 the opsin repertoire of *E. superba* shedding light on a complex photoreception system  
521 able to coordinate the physiological and behavioral responses to the extreme daily  
522 (diel vertical migration) and seasonal changes in photoperiod and spectral  
523 composition. Arthropsins are rhabdomeric non-visual opsins and its clade is the sister  
524 group of the bilaterian rhabdomeric opsins [49, 50]. It was first discovered in the  
525 crustacean *Daphnia pulex* and subsequently in other arthropods, onychophoran,  
526 molluscs, annelids and flatworms [49-53]. Of relevance is the identification of an  
527 onychopsin which has been suggested to be the common ancestor of *Panarthropoda*  
528 visual opsins [49], and possibly sensitive to wavelength from UV to green light [54].  
529 *EsOnychopsin* could represent the short-wavelength sensitive opsin (SWS/UV) which  
530 we have long been searching for. Indeed, the absence of a SWS/UV opsin was truly  
531 unexpected in an organism that shows daily vertical migration reaching depth beyond  
532 the 30 m, where only short wavelength light can penetrate.

533 Finally, KrillDB<sup>2</sup> includes the first evidence of the role of non-coding RNAs in krill.  
534 Although this is just a preliminary analysis, the results we have described already hint  
535 at a role of microRNAs in defining the adaptive capabilities of this species to the  
536 Antarctic environment. This represents a promising starting point for the study of non-  
537 coding RNAs in the Antarctic krill and in other species belonging to the same family.

## 538 Acknowledgments

539 The position of Ilenia Urso was supported by the Helmholtz Virtual Institute  
540 "PolarTime": Biological timing in a changing marine environment - clocks and rhythms  
541 in polar pelagic organisms (VH-VI-500), headed by Bettina Meyer. Alberto Biscontin  
542 was funded by the "Programma Nazionale di Ricerche in Antartide – PNRA" (grant  
543 2016\_00225) and by the Promega Corporation 2019 Real-Time PCR Grant Program.  
544 We would also like to acknowledge the CAPRI initiative (Calcolo ad Alte Prestazioni  
545 per la Ricerca e l'Innovazione", University of Padova Strategic Research Infrastructure  
546 Grant 2017) for the technical support and the HPC resources we have used for the  
547 analyses. Cristiano Bertolucci was supported by the "Programma Nazionale di  
548 Ricerche in Antartide – PNRA" (grant 2016\_00225) and by the University of Ferrara  
549 research grant (FIR2020 and FAR2021).

550

## 551 References

- 552 1. Nicol, S., & Endo, Y. (1997). Krill fisheries of the world (No. 367). Food &  
553 Agriculture Org..
- 554 2. Atkinson, A., Siegel, V., Pakhomov, E. A., Rothery, P., Loeb, V., Ross, R. M., ... &  
555 Fleming, A. H. Atkinson, A., Siegel, V., Pakhomov, E. A., Rothery, P., Loeb, V.,  
556 Ross, R. M., ... & Fleming, A. H. (2008). Oceanic circumpolar habitats of Antarctic  
557 krill. *Marine Ecology Progress Series*, 362, 1-23., 2008. doi:  
558 [org/10.3354/meps07498](https://doi.org/10.3354/meps07498)
- 559 3. Hofmann, E. E., & Murphy, E. J. (2004). Advection, krill, and Antarctic marine  
560 ecosystems. *Antarctic Science*, 16(4). doi: 10.1017/s0954102004002275
- 561 4. Siegel, V. (2005). Distribution and population dynamics of *Euphausia superba*:  
562 summary of recent findings. *Polar Biology*, 29(1), 1-22. doi: 10.1007/s00300-005-  
563 0058-5
- 564 5. Bortolotto, E., Bucklin, A., Mezzavilla, M., Zane, L., & Patarnello, T. (2011). Gone  
565 with the currents: lack of genetic differentiation at the circum-continental scale in  
566 the Antarctic krill *Euphausia superba*. *BMC genetics*, 12(1), 1-18. doi:  
567 [10.1186/1471-2156-12-32](https://doi.org/10.1186/1471-2156-12-32)
- 568 6. Valentine, J. W., & Ayala, F. J. (1976). Genetic variability in krill. *Proceedings of*  
569 *the National Academy of Sciences*, 73(2), 658-660. doi: 10.1073/pnas.73.2.658.
- 570 7. Batta-Lona, P. G., Bucklin, A., Wiebe, P. H., Patarnello, T., & Copley, N. J. (2011).  
571 Population genetic variation of the Southern Ocean krill, *Euphausia superba*, in the  
572 Western Antarctic Peninsula region based on mitochondrial single nucleotide  
573 polymorphisms (SNPs). *Deep Sea Research Part II: Topical Studies in*  
574 *Oceanography*, 58(13-16), 1652-1661. doi: 10.1016/j.dsr2.2010.11.017
- 575 8. Goodall-Copestake, W. P., Perez-Espona, S., Clark, M. S., Murphy, E. J., Seear,  
576 P. J., & Tarling, G. A. (2010). Swarms of diversity at the gene *cox1* in Antarctic krill.  
577 *Heredity*, 104(5), 513-518. doi: 10.1038/hdy.2009.188
- 578 9. Zane, L., Ostellari, L., Maccatrozzo, L., Bargelloni, L., Battaglia, B., & Patarnello,  
579 T. (1998). Molecular evidence for genetic subdivision of Antarctic krill (*Euphausia*  
580 *superba* Dana) populations. *Proceedings of the Royal Society of London. Series*  
581 *B: Biological Sciences*, 265(1413), 2387-2391. doi: 10.1098/rspb.1998.0588
- 582 10. Jeffery, N. W. (2012). The first genome size estimates for six species of krill  
583 (Malacostraca, Euphausiidae): large genomes at the north and south poles. *Polar*  
584 *Biology*, 35(6), 959-962. doi: 10.1007/s00300-011-1137-4
- 585 11. Clark, M. S., Thorne, M. A., Toullec, J. Y., Meng, Y., Peck, L. S., & Moore, S.  
586 (2011). Antarctic krill 454 pyrosequencing reveals chaperone and stress  
587 transcriptome. *PLoS one*, 6(1), e15919. doi: 10.1371/journal.pone.0015919
- 588 12. De Pittà, C., Bertolucci, C., Mazzotta, G. M., Bernante, F., Rizzo, G., De Nardi, B.,  
589 ... & Costa, R. (2008). Systematic sequencing of mRNA from the Antarctic krill  
590 (*Euphausia superba*) and first tissue specific transcriptional signature. *BMC*  
591 *genomics*, 9(1), 1-14. doi: 10.1186/1471-2164-9-45
- 592 13. De Pittà, C., Biscontin, A., Albiero, A., Sales, G., Millino, C., Mazzotta, G. M., ... &  
593 Costa, R. (2013). The Antarctic krill *Euphausia superba* shows diurnal cycles of  
594 transcription under natural conditions. *PLoS One*, 8(7), e68652. doi:  
595 [10.1371/journal.pone.0068652](https://doi.org/10.1371/journal.pone.0068652)
- 596 14. Martins, M. J. F., Lago-Leston, A., Anjos, A., Duarte, C. M., Agusti, S., Serrão, E.  
597 A., & Pearson, G. A. (2015). A transcriptome resource for Antarctic krill (*Euphausia*  
598 *superba* Dana) exposed to short-term stress. *Marine genomics*, 23, 45-47. doi:  
599 [10.1016/j.margen.2015.04.008](https://doi.org/10.1016/j.margen.2015.04.008)

- 600 15. Meyer, B., Martini, P., Biscontin, A., De Pittà, C., Romualdi, C., Teschke, M., ... &  
601 Kawaguchi, S. (2015). Pyrosequencing and de novo assembly of Antarctic krill (*E*  
602 *uphausia superba*) transcriptome to study the adaptability of krill to climate-induced  
603 environmental changes. *Molecular ecology resources*, 15(6), 1460-1471. doi:  
604 10.1111/1755-0998.12408
- 605 16. Seear, P. J., Tarling, G. A., Burns, G., Goodall-Copestake, W. P., Gaten, E.,  
606 Özkaya, Ö., & Rosato, E. (2010). Differential gene expression during the moult  
607 cycle of Antarctic krill (*Euphausia superba*). *BMC genomics*, 11(1), 1-13. doi:  
608 10.1186/1471-2164-11-582
- 609 17. Sales, G., Deagle, B. E., Calura, E., Martini, P., Biscontin, A., De Pittà, C., ... &  
610 Jarman, S. (2017). KrillDB: A de novo transcriptome database for the Antarctic krill  
611 (*Euphausia superba*). *PLoS One*, 12(2), e0171908. doi:  
612 10.1371/journal.pone.0171908
- 613 18. Grabherr, M. G., Haas, B. J., Yassour, M., Levin, J. Z., Thompson, D. A., Amit, I.,  
614 ... & Regev, A. (2011). Trinity: reconstructing a full-length transcriptome without a  
615 genome from RNA-Seq data. *Nature biotechnology*, 29(7), 644. doi:  
616 10.1038/nbt.1883
- 617 19. Liu, J., Li, G., Chang, Z., Yu, T., Liu, B., McMullen, R., ... & Huang, X. (2016).  
618 BinPacker: packing-based de novo transcriptome assembly from RNA-seq data.  
619 *PLoS computational biology*, 12(2), e1004772. doi: 10.1371/journal.pcbi.1004772
- 620 20. Bushmanova, E., Antipov, D., Lapidus, A., & Prjibelski, A. D. (2019). rnaSPAdes:  
621 a de novo transcriptome assembler and its application to RNA-Seq data.  
622 *GigaScience*, 8(9), giz100. doi: 10.1093/gigascience/giz100
- 623 21. Zhao, Q. Y., Wang, Y., Kong, Y. M., Luo, D., Li, X., & Hao, P. (2011, December).  
624 Optimizing de novo transcriptome assembly from short-read RNA-Seq data: a  
625 comparative study. In *BMC bioinformatics* (Vol. 12, No. 14, pp. 1-12). BioMed  
626 Central. doi: 10.1186/1471-2105-12-S14-S2
- 627 22. Peng, Y., Leung, H. C., Yiu, S. M., Lv, M. J., Zhu, X. G., & Chin, F. Y. (2013).  
628 IDBA-tran: a more robust de novo de Bruijn graph assembler for transcriptomes  
629 with uneven expression levels. *Bioinformatics*, 29(13), i326-i334. doi:  
630 10.1093/bioinformatics/btt219
- 631 23. Simão, F. A., Waterhouse, R. M., Ioannidis, P., Kriventseva, E. V., & Zdobnov, E.  
632 M. (2015). BUSCO: assessing genome assembly and annotation completeness  
633 with single-copy orthologs. *Bioinformatics*, 31(19), 3210-3212. doi:  
634 10.1093/bioinformatics/btv351
- 635 24. Bolger, A. M., Lohse, M., & Usadel, B. (2014). Trimmomatic: a flexible trimmer for  
636 Illumina sequence data. *Bioinformatics*, 30(15), 2114-2120. doi:  
637 10.1093/bioinformatics/btu170
- 638 25. Andrews, S. (2017). FastQC: a quality control tool for high throughput sequence  
639 data. 2010.
- 640 26. Patro, R., Duggal, G., Love, M. I., Irizarry, R. A., & Kingsford, C. (2017). Salmon  
641 provides fast and bias-aware quantification of transcript expression. *Nature*  
642 *methods*, 14(4), 417-419. doi: 10.1038/nmeth.4197
- 643 27. Love, M. I., Soneson, C., & Robinson, M. D. (2017). Importing transcript  
644 abundance datasets with tximport. *Dim Txi. Inf. Rep. Sample1*, 1, 5.
- 645 28. Li, W., & Godzik, A. (2006). Cd-hit: a fast program for clustering and comparing  
646 large sets of protein or nucleotide sequences. *Bioinformatics*, 22(13), 1658-1659.  
647 doi: 10.1093/bioinformatics/btl158
- 648 29. Gilbert, D. G. (2019). Genes of the pig, *Sus scrofa*, reconstructed with  
649 EvidentialGene. *PeerJ*, 7, e6374. doi: 10.7717/peerj.6374



- 650 30. Gilbert, D. G. (2019). Longest protein, longest transcript or most expression, for  
651 accurate gene reconstruction of transcriptomes? bioRxiv, 829184. doi:  
652 10.1101/829184
- 653 31. Biscontin, A., Wallach, T., Sales, G., Grudziecki, A., Janke, L., Sartori, E., ... &  
654 Costa, R. (2017). Functional characterization of the circadian clock in the Antarctic  
655 krill, *Euphausia superba*. *Scientific reports*, 7(1), 1-13. doi: 10.1038/s41598-017-  
656 18009-2
- 657 32. Davidson, N. M., Hawkins, A. D., & Oshlack, A. (2017). SuperTranscripts: a data  
658 driven reference for analysis and visualization of transcriptomes. *Genome biology*,  
659 18(1), 1-10. doi: 10.5281/zenodo.830594
- 660 33. Altenhoff, A. M., Levy, J., Zarowiecki, M., Tomiczek, B., Vesztröcy, A. W.,  
661 Dalquen, D. A., ... & Dessimoz, C. (2019). OMA standalone: orthology inference  
662 among public and custom genomes and transcriptomes. *Genome research*, 29(7),  
663 1152-1163. doi: 10.1101/gr.243212.118
- 664 34. Altenhoff, A. M., Gil, M., Gonnet, G. H., & Dessimoz, C. (2013). Inferring  
665 hierarchical orthologous groups from orthologous gene pairs. *PloS one*, 8(1),  
666 e53786. doi: 10.1371/journal.pone.0053786
- 667 35. Höring, F., Biscontin, A., Harms, L., Sales, G., Reiss, C. S., De Pittà, C., & Meyer,  
668 B. (2021). Seasonal gene expression profiling of Antarctic krill in three different  
669 latitudinal regions. *Marine Genomics*, 56, 100806. doi:  
670 10.1016/j.margen.2020.100806
- 671 36. Suter, L., Polanowski, A. M., King, R., Romualdi, C., Sales, G., Kawaguchi, S., ...  
672 & Deagle, B. E. (2019). Sex identification from distinctive gene expression patterns  
673 in Antarctic krill (*Euphausia superba*). *Polar Biology*, 42(12), 2205-2217. doi:  
674 10.1007/s00300-019-02592-3
- 675 37. Risso, D., & Course, I. B. S. (2015). RNA-seq Normalization and Batch Effect  
676 Removal.
- 677 38. Kadri, S., Hinman, V., & Benos, P. V. (2009). HHMMiR: efficient de novo prediction  
678 of microRNAs using hierarchical hidden Markov models. *BMC bioinformatics*,  
679 10(1), 1-12. doi: 10.1186/1471-2105-10-S1-S35
- 680 39. Henze, M. J., & Oakley, T. H. (2015). The dynamic evolutionary history of  
681 pancrustacean eyes and opsins. *Integrative and comparative biology*, 55(5), 830-  
682 842. doi: 10.1093/icb/icv100
- 683 40. DeLeo, D. M., & Bracken-Grissom, H. D. (2020). Illuminating the impact of diel  
684 vertical migration on visual gene expression in deep-sea shrimp. *Molecular  
685 Ecology*, 29(18), 3494-3510. doi: 10.1111/mec.15570
- 686 41. Biscontin, A., Frigato, E., Sales, G., Mazzotta, G. M., Teschke, M., De Pittà, C., ...  
687 & Bertolucci, C. (2016). The opsin repertoire of the Antarctic krill *Euphausia  
688 superba*. *Marine genomics*, 29, 61-68. doi: 10.1016/j.margen.2016.04.010
- 689 42. Hölzer, M., & Marz, M. (2019). De novo transcriptome assembly: A comprehensive  
690 cross-species comparison of short-read RNA-Seq assemblers. *GigaScience*, 8(5),  
691 giz039. doi: 10.1093/gigascience/giz039
- 692 43. Hunt, B. J., Özkaya, Ö., Davies, N. J., Gaten, E., Seear, P., Kyriacou, C. P., Tarling  
693 G., Rosato, E. (2017). The *Euphausia superba* transcriptome database, Superba  
694 SE: An online, open resource for researchers. *Ecology and evolution*, 7(16), 6060-  
695 6077. doi: 10.1002/ece3.3168
- 696 44. Khajuria, C., Buschman, L. L., Chen, M. S., Muthukrishnan, S., & Zhu, K. Y.  
697 (2010). A gut-specific chitinase gene essential for regulation of chitin content of  
698 peritrophic matrix and growth of *Ostrinia nubilalis* larvae. *Insect biochemistry and  
699 molecular biology*, 40(8), 621-629. doi: 10.1016/j.ibmb.2010.06.003

- 700 45. Jia, L. Y., Chen, L., Keller, L., Wang, J., Xiao, J. H., & Huang, D. W. (2018).  
701 Doublesex evolution is correlated with social complexity in ants. *Genome biology*  
702 and evolution, 10(12), 3230-3242. doi: 10.1093/gbe/evy250
- 703 46. Bao, Y. Y., Qin, X., Yu, B., Chen, L. B., Wang, Z. C., & Zhang, C. X. (2014).  
704 Genomic insights into the serine protease gene family and expression profile  
705 analysis in the planthopper, *Nilaparvata lugens*. *BMC genomics*, 15(1), 1-17. doi:  
706 10.1186/1471-2164-15-507
- 707 47. Buchholz, F., Watkins, J. L., Priddle, J., Morris, D. J., & Ricketts, C. (1996). Moulting  
708 in relation to some aspects of reproduction and growth in swarms of Antarctic krill,  
709 *Euphausia superba*. *Marine Biology*, 127(2), 201-208. doi: 10.1007/BF00942104
- 710 48. Tarling, G. A., & Cuzin-Roudy, J. (2003). Synchronization in the molting and  
711 spawning activity of northern krill (*Meganyctiphanes norvegica*) and its effect on  
712 recruitment. *Limnology and Oceanography*, 48(5), 2020-2033. doi:  
713 10.4319/llo.2003.48.5.2020
- 714 49. Hering, L., Henze, M.J., Kohler, M., Kelber, A., Bleidorn, C., Leschke, M., Nickel,  
715 B., Meyer, M., Kircher, M., Sunnucks, P., Mayer, G. (2012) Opsins in onychophora  
716 (velvet worms) suggest a single origin and subsequent diversification of visual  
717 pigments in arthropods. *Molecular Biology & Evolution*, 29(11), 3451-3458. doi:  
718 10.1093/molbev/mss148
- 719 50. Hering, L., and Mayer, G. (2014). Analysis of the opsin repertoire in the tardigrade  
720 *Hypsibius dujardini* provides insights into the evolution of opsin genes in  
721 Panarthropoda. *Genome Biol. Evol.* 6, 2380–2391. doi: 10.1093/gbe/evu193
- 722 51. Colbourne, J. K., Pfrender, M. E., Gilbert, D., Thomas, W. K., Tucker, A., Oakley,  
723 T. H., et al. (2011). The ecoresponsive genome of *Daphnia pulex*. *Science* 331,  
724 555–561. doi: 10.1126/science.1197761
- 725 52. Eriksson, B. J., Fredman, D., Steiner, G., and Schmid, A. (2013). Characterisation  
726 and localisation of the opsin protein repertoire in the brain and retinas of a spider  
727 and an onychophoran. *BMC Evol. Biol.* 13:186. doi: 10.1186/1471-2148-13-186
- 728 53. Futahashi, R., Kawahara-Miki, R., Kinoshita, M., Yoshitake, K., Yajima, S.,  
729 Arikawa, K., et al. (2015). Extraordinary diversity of visual opsin genes in  
730 dragonflies. *Proc. Natl. Acad. Sci. U.S.A.* 112, E1247–E1256. doi:  
731 10.1073/pnas.1424670112
- 732 54. Beckmann, H., Hering, L., Henze, M. J., Kelber, A., Stevenson, P. A., & Mayer, G.  
733 (2015). Spectral sensitivity in Onychophora (velvet worms) revealed by  
734 electroretinograms, phototactic behaviour and opsin gene expression. *Journal of*  
735 *Experimental Biology*, 218(6), 915-922. doi: 10.1242/jeb.116780

## 736 Data Accessibility

737 Data used for the krill transcriptome reconstruction and for the generation of the  
738 Expression Atlas was downloaded from the NCBI Short Read Archive, under  
739 accessions: [PRJEB30084](#), [PRJNA362526](#), [PRJEB30084](#), [PRJNA362526](#) and  
740 [PRJNA640244](#).

741

## 742 Author Contributions

743 IU, CDP, BM and GS conceived the study. IU and DC performed the analyses. IU, AB,  
744 BM and GS wrote the manuscript. CB, CR and CDP advised on data analysis and  
745 reviewed the text.

746
